# Supplementary material
Source: PubMed Central journal article supplement (PMC6795549)
Supplement: EMS84482-supplement-Supplementary_Tables.pdf [file EMS84482-supplement-Supplementary_Tables.pdf]

559 **Supplementary Materials**

- Supplementary Table 1** Adjusted rate ratios (RR) and 95% confidence intervals (CI) for risk of ischaemic stroke (IS; N = 5475) and intracerebral haemorrhage (ICH; N = 4776) by concentrations of major blood lipids in observational analyses in CKB, with and without adjustment for body mass index (BMI)
- Supplementary Table 2** Characteristics of the 46 LDL-C associated genetic variants obtained from the Global Lipids Genetics Consortium
- Supplementary Table 3** Summary-level Mendelian randomisation sensitivity analyses of associations of genetically-instrumented LDL-C with risk of ischaemic stroke (N = 5567) and intracerebral haemorrhage (N = 4911) in CKB
- Supplementary Table 4** Age-specific rates of ischaemic stroke, intracerebral haemorrhage, and major coronary events in the CKB prospective study, by different levels of background vascular risk

560  
561

**Supplementary Table 1: Adjusted rate ratios (RR) for risk of ischaemic stroke (IS; N = 5475) and intracerebral haemorrhage (ICH; N = 4776) by concentrations of major blood lipids in observational analyses in CKB, with and without adjustment for body mass index (BMI)<sup>a</sup>**

| Major blood lipids (SD)                  | RR (95% CI) per SD higher   |                  |                                      |                  | P for heterogeneity between IS and ICH |
|------------------------------------------|-----------------------------|------------------|--------------------------------------|------------------|----------------------------------------|
|                                          | Ischaemic stroke (N = 5475) |                  | Intracerebral haemorrhage (N = 4776) |                  |                                        |
|                                          | Without BMI                 | With BMI         | Without BMI                          | With BMI         |                                        |
| <b>LDL-C</b><br>(0.68 mmol/L)            | 1.12 (1.07-1.16)            | 1.10 (1.06-1.15) | 0.90 (0.86-0.95)                     | 0.91 (0.87-0.96) | P=4.2×10 <sup>-11</sup>                |
| <b>HDL-C</b><br>(0.29 mmol/L)            | 0.93 (0.89-0.97)            | 0.94 (0.90-0.99) | 1.00 (0.96-1.05)                     | 0.98 (0.94-1.02) | P=0.01                                 |
| <b>Triglycerides<sup>b</sup></b><br>0.58 | 1.05 (1.00-1.10)            | 1.03 (0.98-1.08) | 0.87 (0.82-0.91)                     | 0.88 (0.84-0.93) | P=1.3×10 <sup>-8</sup>                 |

SD=Standard deviation; CI=Confidence intervals.

<sup>a</sup> Cox regression was used to estimate the rate ratios (95% CI), as shown in column 2, 3, 4, and 5, per SD unit higher concentrations of measured blood lipids. The analyses were stratified by age-at-risk (5-year), sex, and study area, and adjusted for education, smoking, alcohol consumption, physical activity, diabetes, and baseline systolic blood pressure, with and without adjustment for BMI. Chi-square test was used for heterogeneity. All P-values (two-sided) were uncorrected for multiple testing.

<sup>b</sup> Values for triglycerides are natural logarithm of triglyceride measurements.

562

563

**Supplementary Table 2. Characteristics of the 46 LDL-C associated genetic variants obtained from the Global Lipids Genetics Consortium**

| Marker                 | Locus               | Chr | Position <sup>a</sup> | Effect Allele | Other Allele | GLGC  |         | CKB <sup>b</sup> |         |
|------------------------|---------------------|-----|-----------------------|---------------|--------------|-------|---------|------------------|---------|
|                        |                     |     |                       |               |              | Beta  | P-value | Beta             | P-value |
| rs10903129             | <i>MACO1</i>        | 1   | 25768937              | G             | A            | 0.033 | 4E-19   | 0.034            | 4E-03   |
| rs1998013 <sup>c</sup> | <i>RNU6-830P</i>    | 1   | 55958030              | C             | T            | 0.381 | 4E-67   | NA               | NA      |
| rs646776               | <i>CELSR2</i>       | 1   | 109818530             | T             | C            | 0.161 | 1E-292  | 0.209            | 2E-20   |
| rs267733               | <i>ANXA9</i>        | 1   | 150958836             | A             | G            | 0.033 | 5E-10   | -0.013           | 6E-01   |
| rs2642438              | <i>MARC1</i>        | 1   | 220970028             | G             | A            | 0.035 | 4E-17   | 0.061            | 3E-05   |
| rs1367117              | <i>APOB</i>         | 2   | 21263900              | A             | G            | 0.119 | 2E-196  | 0.102            | 2E-10   |
| rs515135               | <i>APOB</i>         | 2   | 21286057              | C             | T            | 0.139 | 1E-188  | -0.011           | 6E-01   |
| rs6544713              | <i>ABCG8</i>        | 2   | 44073881              | T             | C            | 0.081 | 6E-85   | -0.107           | 1E-01   |
| rs2710642              | <i>EHBP1</i>        | 2   | 63149557              | A             | G            | 0.024 | 3E-10   | 0.031            | 8E-03   |
| rs2030746              | <i>LOC105373585</i> | 2   | 121309488             | T             | C            | 0.021 | 2E-08   | 0.006            | 6E-01   |
| rs2287623              | <i>ABCB11</i>       | 2   | 169830155             | G             | A            | 0.022 | 7E-09   | 0.031            | 1E-02   |
| rs1250229              | <i>LOC105373868</i> | 2   | 216304384             | C             | T            | 0.024 | 8E-09   | 0.034            | 2E-01   |
| rs11563251             | <i>UGT1A</i>        | 2   | 234679384             | T             | C            | 0.035 | 2E-08   | 0.021            | 3E-01   |
| rs7640978              | <i>CMTM6</i>        | 3   | 32533010              | C             | T            | 0.039 | 1E-08   | -0.037           | 1E-01   |
| rs17345563             | <i>DNAJC13</i>      | 3   | 132209203             | A             | G            | 0.036 | 3E-10   | 0.016            | 4E-01   |
| rs7703051              | <i>ANKRD31</i>      | 5   | 74625487              | A             | C            | 0.073 | 5E-85   | 0.081            | 3E-14   |
| rs4530754              | <i>CSNK1G3</i>      | 5   | 122855416             | A             | G            | 0.028 | 4E-14   | -0.013           | 2E-01   |
| rs6882076              | <i>TIMD4</i>        | 5   | 156390297             | C             | T            | 0.046 | 5E-33   | 0.059            | 1E-06   |
| rs1800562              | <i>HFE</i>          | 6   | 26093141              | G             | A            | 0.062 | 2E-14   | -0.012           | 9E-01   |
| rs1564348              | <i>SLC22A1</i>      | 6   | 160578860             | C             | T            | 0.048 | 3E-22   | 0.075            | 4E-01   |
| rs12670798             | <i>DNAH11</i>       | 7   | 21607352              | C             | T            | 0.034 | 7E-16   | 0.019            | 7E-02   |
| rs4722551              | <i>LOC105375199</i> | 7   | 25991826              | C             | T            | 0.039 | 7E-16   | 0.031            | 3E-01   |
| rs2073547              | <i>NPC1L1</i>       | 7   | 44582331              | G             | A            | 0.049 | 5E-23   | -0.003           | 8E-01   |
| rs217386               | <i>NPC1L1</i>       | 7   | 44600695              | G             | A            | 0.036 | 8E-22   | 0.013            | 7E-01   |
| rs10102164             | <i>TRMT112P7</i>    | 8   | 55421614              | A             | G            | 0.032 | 3E-12   | 0.044            | 7E-04   |
| rs3780181              | <i>VLDLR</i>        | 9   | 2640759               | A             | G            | 0.045 | 1E-09   | 0.063            | 3E-03   |
| rs8176720              | <i>ABO</i>          | 9   | 136132873             | T             | C            | 0.033 | 6E-18   | 0.034            | 2E-03   |
| rs579459               | <i>ABO</i>          | 9   | 136154168             | C             | T            | 0.067 | 3E-49   | 0.088            | 9E-12   |
| rs174532               | <i>MYRF</i>         | 11  | 61548874              | A             | G            | 0.035 | 5E-17   | 0.068            | 6E-01   |
| rs1535                 | <i>FADS2</i>        | 11  | 61597972              | A             | G            | 0.053 | 3E-43   | 0.041            | 2E-04   |
| rs11220462             | <i>ST3GAL4</i>      | 11  | 126243952             | A             | G            | 0.059 | 3E-23   | 0.029            | 1E-02   |
| rs1186380              | <i>RPL12P33</i>     | 12  | 121376416             | C             | T            | 0.024 | 1E-08   | 0.015            | 2E-01   |
| rs1169288              | <i>HNF1A</i>        | 12  | 121416650             | C             | A            | 0.038 | 9E-21   | 0.018            | 1E-01   |
| rs4942486              | <i>BRCA2</i>        | 13  | 32953388              | T             | C            | 0.024 | 3E-11   | 0.041            | 2E-04   |
| rs8017377              | <i>NYNRIN</i>       | 14  | 24883887              | A             | G            | 0.031 | 3E-15   | 0.062            | 8E-03   |
| rs2000999              | <i>TXNL4B</i>       | 16  | 72108093              | A             | G            | 0.065 | 1E-45   | 0.033            | 6E-03   |
| rs314253               | <i>ASGR1</i>        | 17  | 7091650               | T             | C            | 0.024 | 2E-10   | 0.031            | 5E-03   |
| rs4791641              | <i>PFAS</i>         | 17  | 8161149               | C             | T            | 0.021 | 5E-08   | -0.007           | 6E-01   |
| rs6511720              | <i>LDLR</i>         | 19  | 11202306              | G             | T            | 0.221 | 3E-289  | 0.184            | 3E-03   |
| rs688                  | <i>LDLR</i>         | 19  | 11227602              | T             | C            | 0.054 | 9E-48   | 0.077            | 6E-08   |
| rs6859                 | <i>NECTIN2</i>      | 19  | 45382034              | A             | G            | 0.084 | 1E-101  | -0.041           | 5E-04   |
| rs7254892              | <i>NECTIN2</i>      | 19  | 45389596              | G             | A            | 0.485 | 8E-365  | 0.702            | 9E-246  |
| rs492602               | <i>FUT2</i>         | 19  | 49206417              | G             | A            | 0.029 | 3E-14   | 0.043            | 5E-01   |
| rs364585               | <i>LINC01722</i>    | 20  | 12962718              | G             | A            | 0.025 | 4E-11   | -0.003           | 8E-01   |
| rs2328223              | <i>LOC107985440</i> | 20  | 17845921              | C             | A            | 0.031 | 2E-09   | 0.021            | 1E-01   |
| rs5763662              | <i>MEMR3</i>        | 22  | 30378703              | T             | C            | 0.077 | 2E-10   | 0.022            | 2E-01   |

Chr.=Chromosome; Effect alleles are given as the LDL-C raising allele in the Global Lipids Genetics Consortium data<sup>49,50</sup>;

<sup>a</sup> Genomic coordinates were in Build hg19;

<sup>b</sup> The analyses were conducted in 17,567 CKB participants with available data. General linear regression was used to estimate SD differences in LDL-C (after rank-inverse-normal transformation) per 1 effect allele, adjusted for sex, age, age-squared, and case status. The analyses were performed for each study area, and the overall estimates were obtained by inverse-variance-weighted meta-analyses. All P-values (two-sided) were uncorrected for multiple testing.

<sup>c</sup> Monogenic in the present study.

**Supplementary Table 3: Summary-level Mendelian randomisation sensitivity analyses of associations of genetically-instrumented LDL-C with risk of ischaemic stroke (N = 5567) and intracerebral haemorrhage (N = 4911) in CKB<sup>a</sup>**

| Methods                          | Ischaemic stroke<br>(N = 5567) |       |        |       |         | Intracerebral haemorrhage<br>(N = 4911) |       |        |       |         |
|----------------------------------|--------------------------------|-------|--------|-------|---------|-----------------------------------------|-------|--------|-------|---------|
|                                  | Beta                           | SE    | LCI    | UCI   | P-value | Beta                                    | SE    | LCI    | UCI   | P-value |
| <i>Main analyses:</i>            | 0.282                          | 0.117 | 0.054  | 0.511 | 0.015   | -0.122                                  | 0.109 | -0.337 | 0.092 | 0.264   |
| <i>Sensitivity analyses:</i>     |                                |       |        |       |         |                                         |       |        |       |         |
| Weighted median                  | 0.126                          | 0.122 | -0.114 | 0.366 | 0.304   | -0.072                                  | 0.114 | -0.296 | 0.152 | 0.530   |
| Inverse-variance weighted method | 0.210                          | 0.114 | -0.014 | 0.433 | 0.066   | -0.099                                  | 0.100 | -0.295 | 0.097 | 0.322   |
| MR-Egger (Causal estimates)      | 0.101                          | 0.131 | -0.156 | 0.359 | 0.440   | -0.056                                  | 0.118 | -0.287 | 0.174 | 0.631   |
| MR-Egger (Intercept)             | 0.011                          | 0.007 | -0.002 | 0.024 | 0.112   | -0.004                                  | 0.006 | -0.016 | 0.008 | 0.484   |

SE=standard error; LCI=lower confidence interval; UCI=upper confidence interval.

<sup>a</sup> The Betas and SEs were estimated using published methods with R package<sup>51</sup>, per 1 mmol/L higher concentrations of genetically-instrumented LDL-C. All P-values (two-sided) were uncorrected for multiple testing.

565

566

567

**Supplementary Table 4: Age-specific rates of ischaemic stroke, intracerebral haemorrhage, and major coronary events in the CKB prospective study, by different levels of background vascular risk**

| Age at risk                    | Ischemic stroke  |               |                |                | Intracerebral hemorrhage |               |                |                | Major coronary events |               |                |                |
|--------------------------------|------------------|---------------|----------------|----------------|--------------------------|---------------|----------------|----------------|-----------------------|---------------|----------------|----------------|
|                                | Person-years     | No. of events | Rates (% p.a.) | Events avoided | Person-years             | No. of events | Rates (% p.a.) | Excess events  | Person-years          | No. of events | Rates (% p.a.) | Events avoided |
| <b>Low-risk (n=336,696)</b>    |                  |               |                |                |                          |               |                |                |                       |               |                |                |
| <50                            | 1,258,546        | 1,356         | 0.11           | 11 (1)         | 1,261,482                | 324           | 0.03           | -2 (1)         | 1,262,025             | 209           | 0.02           | 2 (0)          |
| 50-60                          | 979,911          | 4,041         | 0.41           | 41 (4)         | 990,273                  | 538           | 0.05           | -5 (2)         | 990,637               | 507           | 0.05           | 6 (1)          |
| 60-70                          | 558,263          | 4,636         | 0.83           | 83 (9)         | 571,871                  | 739           | 0.13           | -11 (5)        | 572,227               | 753           | 0.13           | 17 (1)         |
| ≥70                            | 226,053          | 4,470         | 1.98           | 198 (20)       | 240,434                  | 929           | 0.39           | -33 (14)       | 240,596               | 1,149         | 0.48           | 60 (4)         |
| Overall                        | 3,022,772        | 14,503        | 0.48           | 48 (5)         | 3,064,060                | 2,530         | 0.08           | -7 (3)         | 3,065,485             | 2,618         | 0.09           | 11 (1)         |
| <b>Medium-risk (n=153,066)</b> |                  |               |                |                |                          |               |                |                |                       |               |                |                |
| <50                            | 228,332          | 960           | 0.42           | 42 (4)         | 229,893                  | 459           | 0.2            | -17 (7)        | 230,589               | 158           | 0.07           | 9 (1)          |
| 50-60                          | 408,045          | 3,788         | 0.93           | 93 (9)         | 416,966                  | 1,238         | 0.3            | -25 (11)       | 419,006               | 513           | 0.12           | 15 (1)         |
| 60-70                          | 404,001          | 6,427         | 1.59           | 159 (16)       | 422,308                  | 1,860         | 0.44           | -37 (16)       | 424,513               | 1,090         | 0.26           | 32 (2)         |
| ≥70                            | 258,092          | 7,191         | 2.79           | 279 (28)       | 281,546                  | 2,183         | 0.78           | -66 (28)       | 282,573               | 2,212         | 0.78           | 98 (6)         |
| Overall                        | 1,298,469        | 18,366        | 1.41           | 141 (15)       | 1,350,713                | 5,740         | 0.42           | -36 (15)       | 1,356,680             | 3,973         | 0.29           | 37 (2)         |
| <b>High-risk (n=23,129)</b>    |                  |               |                |                |                          |               |                |                |                       |               |                |                |
| <50                            | 9,394            | 140           | 1.49           | 149 (15)       | 9,666                    | 58            | 0.6            | -51 (21)       | 9,720                 | 41            | 0.42           | 53 (3)         |
| 50-60                          | 37,871           | 1,025         | 2.71           | 271 (28)       | 40,387                   | 262           | 0.65           | -55 (23)       | 40,739                | 173           | 0.42           | 53 (3)         |
| 60-70                          | 64,497           | 2,486         | 3.85           | 385 (39)       | 72,127                   | 534           | 0.74           | -63 (26)       | 72,534                | 500           | 0.69           | 86 (5)         |
| ≥70                            | 57,237           | 3,129         | 5.47           | 547 (56)       | 69,696                   | 604           | 0.87           | -74 (31)       | 69,428                | 1,029         | 1.48           | 185 (11)       |
| Overall                        | 169,000          | 6780          | 4.01           | 401 (41)       | 191,876                  | 1,458         | 0.76           | -65 (27)       | 192,421               | 1,743         | 0.91           | 113 (7)        |
| <b>Total</b>                   | <b>4,490,241</b> | <b>39,649</b> | <b>0.88</b>    | <b>88 (9)</b>  | <b>4,606,649</b>         | <b>9,728</b>  | <b>0.21</b>    | <b>-18 (8)</b> | <b>4,614,586</b>      | <b>8,334</b>  | <b>0.18</b>    | <b>23 (1)</b>  |

Low-risk: no measured hypertension, or prior history of cardiovascular disease (coronary heart disease, stroke or transient ischemic attack); Medium-risk: with measured hypertension, but with no prior history of cardiovascular disease; High-risk: with prior history of cardiovascular disease. Participants were considered to have measured hypertension if they had measured systolic blood pressure of at least 140 mm Hg or a measured diastolic blood pressure of at least 90 mm Hg or were receiving treatment for hypertension. The latter was defined as those who reported a diagnosis of hypertension by a physician and use of anti-hypertensives at recruitment.
